# Supplementary material
Source: PubMed Central journal article supplement (PMC7233399)
Supplement: ry200642suppa1.pdf [file ry200642suppa1.pdf]

## ارتباط بین یافته های CT اسکن قفسه سینه و تست RT-PCR در بیماری کرونا ویروس 2019 (COVID-19) در چین: گزارشی از 1014 بیمار

### نکات کلیدی

- در بین موارد مشکوک به بیماری COVID-19 در این مطالعه، نرخ موارد مثبت در RT-PCR و CT اسکن قفسه سینه به ترتیب 59% (601/1014) و 88% (888/1014) بود.
- با در نظر گرفتن RT-PCR به عنوان تست مرجع (Reference)، حساسیت (sensitivity) CT اسکن قفسه سینه برای تشخیص COVID-19 97% (580/601) بود. در بیماران با جواب منفی RT-PCR ولی یافته های مثبت به نفع بیماری در CT اسکن قفسه سینه (308 بیمار)، 48% (147/308) به عنوان بیماران با شانس بسیار بالای بیماری (Highly likely) و 33% به عنوان موارد احتمالی بیماری (Probable cases) شناخته شدند.
- با بررسی مکرر RT-PCR و CT اسکن قفسه سینه (Serial RT-PCR and CT scan)، 60 تا 93% از بیماران یافته های CT اسکن اولیه به نفع COVID-19 را قبل از مشخص شدن جواب مثبت RT-PCR نشان دادند. در این بین، 42% بیماران نیز یافته هایی به نفع بهبودی از بیماری، در CT اسکن قفسه سینه را پیش از منفی شدن RT-PCR نشان دادند.

### خلاصه یافته ها

برای تشخیص COVID-19، CT اسکن قفسه سینه حساسیت بالاتری از تست اولیه RT-PCR (Reverse Transcriptase Polymerase Chain Reaction) (Swab) در منطقه اپیدمی چین، دارد.

### چکیده

**پیش زمینه:** CT اسکن قفسه سینه یک ابزار کمی مهم برای تشخیص بیماری جدید کرونا ویروس 2019 (COVID-19) در کنار RT-PCR (Reverse Transcriptase Polymerase Chain Reaction) است.

**هدف:** تعیین ارزش و ثبات تشخیصی (Diagnostic value and consistency) CT اسکن قفسه سینه در مقایسه با RT-PCR برای بیماری COVID-19.

**روش مطالعه:** از 6 ژانویه تا 6 فوریه 2020، 1014 بیمار در ووهان، چین، که برای آن ها هم CT اسکن قفسه سینه و هم RT-PCR در خواست شده بود، در این مطالعه وارد شدند. با در نظر گرفتن RT-PCR به عنوان مرجع (Reference)، عملکرد CT اسکن قفسه سینه در تشخیص COVID-19 بررسی شد. علاوه بر این، برای بیماران با RT-PCR مکرر در سیر بیماری، تغییرات دینامیک جواب آزمایش (به ترتیب، منفی به مثبت یا مثبت به منفی) در مقایسه با یافته های CT اسکن مکرر (با فاصله های 4 روز یا بیشتر) در سیر بیماری مقایسه شد.

**یافته ها:** در بین 1014 بیمار، 59% (601/1014) در RT-PCR و 88% (888/1014) در CT اسکن قفسه سینه نتیجه مثبت داشتند. حساسیت CT اسکن قفسه سینه برای مطرح کردن COVID-19 (Suggesting) بر اساس تست مثبت RT-PCR، برابر 97% (بازه اطمینان 95%: 95 تا 98%)، 508/601 بیمار) بود. در بیماران با نتیجه منفی RT-PCR، 75% (308/413) یافته های مثبت CT اسکن قفسه سینه داشتند، که از بین این 308 بیمار، 48% به عنوان بیماران با شانس بسیار بالای بیماری (Highly likely) و 33% به عنوان موارد احتمالی بیماری (Probable cases) شناخته شدند. با بررسی مکرر RT-PCR و CT اسکن قفسه سینه (Serial RT-PCR and CT scan)، میانگین مدت زمان بین تغییر نتیجه اولیه منفی RT-PCR به مثبت  $1/5 \pm 5/1$  روز، و میانگین مدت زمان بین تغییر نتیجه اولیه مثبت RT-PCR به منفی  $2/3 \pm 6/9$  روز بود. 60 تا 93% از بیماران یافته های مثبت اولیه CT اسکن قفسه سینه به نفع COVID-19 را قبل (یا همزمان) با نتیجه مثبت RT-PCR نشان دادند. 42% (24/57) از بیماران، علائم بهبودی بیماری را در CT اسکن قفسه سینه، زودتر از منفی شدن نتیجه RT-PCR نشان دادند.

**نتیجه گیری:** CT اسکن قفسه سینه برای تشخیص COVID-19 حساسیت بالایی دارد. CT اسکن قفسه سینه می تواند به عنوان ابزار اولیه تشخیص بیماری COVID-19 در مناطق اپیدمی بیماری به کار رود.
